# Supplementary material
Source: PubMed Central journal article supplement (PMC6156652)
Supplement: pnas.1807915115.sapp.pdf [file pnas.1807915115.sapp.pdf]

# The clinical and veterinary trypanocidal benzoxaboroles target CPSF3

Richard J. Wall, Eva Rico, Iva Lukac, Fabio Zuccotto, Sara Elg, Ian H. Gilbert, Yvonne Freund,  
M.R.K. Alley, Mark C. Field, Susan Wyllie and David Horn

## Supporting Information Appendix

|                          |             |
|--------------------------|-------------|
| SI Materials and Methods | pages 2-9   |
| Figures S1-S5            | pages 10-15 |
| Tables S1-S3             | page 16     |

## SI Materials and Methods

**Trypanosomes.** Bloodstream-form *T. b. brucei*, Lister 427, MiTat 1.2, clone 221a and derivatives, including 2T1 cells (1), were cultured at 37°C in the presence of 5% CO<sub>2</sub> in HMI9 medium, as described (2). These cells were transfected using a Nucleofector (Lonza) with T-cell Nucleofector solution. Transformants were cloned by limiting-dilution and selected with phleomycin (1 µg.ml<sup>-1</sup>), blasticidin (10 µg.ml<sup>-1</sup>; maintenance at 2 µg.ml<sup>-1</sup>) or hygromycin (2.5 µg.ml<sup>-1</sup>) for constructs integrated at the tagged *rRNA* locus (3). Cumulative growth curves were generated from cultures seeded at 10<sup>4</sup> cells.ml<sup>-1</sup>, counted on a haemocytometer every 24 h and diluted as necessary. Overexpression and RNAi were induced with 1 µg.ml<sup>-1</sup> tetracycline. For EC<sub>50</sub> assays, overexpression strains were pre-induced for 24 h and assays were carried out using AlamarBlue as described (4). Data was processed using GRAFIT (version 5.0.4; Erithacus software) and fitted to a 2-parameter equation to calculate EC<sub>50</sub>.

**pRPa<sup>OEX</sup> overexpression plasmid assembly.** The pRPa<sup>OEX</sup> construct was assembled as follows. A *lacZ* stuffer fragment, amplified using OEX5 and OEX3, was used to engineer BbsI and FseI restriction sites (*italics*) on either side of the stuffer in pRPa<sup>iSL</sup> (3). Next, NSAS5 and NSAS3 oligonucleotides, containing I-SceI sites and an Ascl site (*italics*) were annealed and cloned in pBluescript digested with NotI. The entire Ascl cassette from the pRPa<sup>iSL</sup> derivative above was then moved to the new Ascl-digested vector, thereby placing I-SceI sites on either side of the assembly. Finally, a blasticidin (*BLA*) resistance cassette was synthesised (Genscript) and, following digestion with NsiI/MluI, was inserted upstream of the *EP* procyclin promoter.

```
OEX5:GATCGGTACCGGCCGGCCGAAGACGATGATGAGATAGGGTTGAGTGTGT  
OEX3:GATCGGGCCCGCTTACGGCGTACACCCTATCAATGATAGAGTGGCCGGCCGAAG  
      CGATGATAAACCCCTGGCGTTACCCAA  
NSAS5:GGCC TAGGGATAACAGGGTAATGGCGCGCCTAGGGATAACAGGGTAAT  
NSAS3:GGCCATTACCCTGTTATCCCTAGGCGCGCCATTACCCTGTTATCCCTA
```

**pRPa<sup>OEX</sup> plasmid overexpression library assembly.** pRPa<sup>OEX</sup> was digested with BbsI and 'semi-filled' with Klenow and dTTP, followed by dephosphorylation with Antarctic phosphatase (New England Biolabs). 25 µg of *T. b. brucei* genomic DNA was digested with 0.04 U Sau3AI/µg gDNA for 1 h at 37°C. The partially digested DNA was separated on an agarose gel (1x TAE, 120V, 35 min). The gel slab containing 3-10 kbp fragments was excised, set in a new gel and concentrated in the gel by reversing the direction of electrophoresis (1x TAE, 120V, 35 min). The *T. b. brucei* DNA was then purified from the gel and 'semi-filled' with Klenow and dGTP. The resulting pRPa<sup>OEX</sup> plasmid and *T. b. brucei* insert DNA were then ligated overnight at 16°C, purified, electroporated in MegaX DH10B Electrocomp T1R cells (Thermo Fisher), added to 500 ml LB-amp media and grown overnight at 37°C. A series of dilutions were also grown on agar plates in order to estimate library complexity; plasmids from 30 colonies were digested with FseI to determine whether inserts were present. The plasmid library was purified from the 500 ml culture using a Qiagen Plasmid Maxi Kit.

***T. b. brucei* overexpression library assembly.** 500 µg of overexpression plasmid library was digested with I-SceI. Plasmid linearization prior to transfection increases transfection efficiency and the use of I-SceI that specifically cleaves an 18 bp sequence, not present in *T. brucei*, ensures that linearization will not reduce library coverage; a restriction enzyme that cleaves a shorter sequence would have fragmented our library constructs; approximately 10% of them in the case of an enzyme that recognises an 8 bp sequence. 2T1 *T. b. brucei* cells were transfected with pSce\* as described (2). A puromycin-sensitive 2T1<sup>Sce\*</sup> clone was expanded (2.5 x 10<sup>9</sup> cells), induced with tetracycline (1 µg/ml) for 3 h and transfected with the I-SceI digested overexpression library: forty replicates with 10 µg DNA and 5 x 10<sup>7</sup> cells in each replicate. After 6 h, phleomycin (1 µg/ml; for the tetracycline operator cassette) and blasticidin (10 µg/ml; for the

library) selection was applied. A series of dilutions were also grown in 96-well plates in order to estimate library complexity; genomic DNA was extracted from 22 clones from these plates to assess the presence of library inserts, amplified using a long-range PCR reaction (see below). Ten inserts were then Sanger sequenced using OEseq1 (GTAAAGTCAATACAACACACAATAGG) and OEseq2 (CTGGCACAGAGAGCGAGC), revealing that they were derived from random sites across the genome, as expected.

**Overexpression library screening and data analysis.** The *T. b. brucei* overexpression library was maintained at or above  $2 \times 10^7$  cells to maintain complexity, in medium containing phleomycin (1  $\mu\text{g/ml}$ ) and blasticidin (1  $\mu\text{g/ml}$ ). Overexpression was induced with tetracycline (1  $\mu\text{g/ml}$ ) for 24 h and  $2 \times 10^7$  cells in 150 ml media were used to initiate each screen. Cells were passaged as required and genomic DNA was extracted after 8-9 days using a Qiagen DNeasy Blood & Tissue Kit. Overexpressed fragments were amplified using the OEseqA primer (CGGCGTACACCCTATCAATGA) in a 'long-range' PCR reaction using LongAmp polymerase (1 cycle: 30 s at 94°C; 30 cycles: 30 s at 94°C, 30 s at 60°C and 9 min at 65°C; 1 cycle: 10 min at 65°C) and purified using a QIAquick PCR Purification Kit. The products were sequenced using an Illumina HiSeq platform at the Beijing Genomics Institute. Reads were aligned to the *T. brucei* 927 reference genome (v9.0, [tritrypdb.org](http://tritrypdb.org)) with Bowtie 2 software (5) using the conditions: very-sensitive-local-phred33. The subsequent alignment files were manipulated with SAMtools (6) and a custom script (2) to identify reads with barcodes (GATAGAGTGGTACCGGCCGG or CAATGATAGAGTGGCCGGCC), which also revealed insert orientation. Total and barcoded reads were then quantified using the Artemis genome browser (7) and Excel.

**Construction of other plasmids.** For knockdown of Tb927.4.1340 (*CPSF3*) using RNA interference, we used CPSF-RF and CPSF-RR primers, incorporating Bsp1201/Acc651 and XbaI/BamHI sites, respectively (*italics*) and cloned the resulting amplified 606 bp fragment in the pRPa<sup>ISL</sup> construct (3). The construct was introduced into 2T1 *T. b. brucei* cells (1), which were selected with hygromycin (2.5 µg/ml) and phleomycin (1 µg/ml); only puromycin sensitive clones were analysed further. For tagging a native Tb927.4.1340 allele with GFP at the C-terminus, we used CPSF-TF and CPSF-TR primers, incorporating HindIII and XbaI sites, respectively (*italics*) and cloned the resulting amplified 654 bp fragment in the pNAT<sup>xGFP</sup> construct (3). The construct was linearised with XhoI prior to transfection and introduced into 2T1 *T. b. brucei* cells (1) with the RNAi construct. These cells were selected with hygromycin and phleomycin as above and also blasticidin. For inducible overexpression of Tb927.4.1340 with GFP at the C-terminus, we used the CPSF-OF primer, incorporating a PacI site (*italics*), and CPSF-TR and cloned the resulting amplified complete coding sequence (2,332 bp) in the pRPa<sup>ixGFP</sup> construct (3). The construct was introduced into 2T1 *T. b. brucei* cells (1), selected with hygromycin and phleomycin as above; again, only puromycin sensitive clones were analysed further. pRPa-based constructs were linearised with AscI prior to transfection. Cas9-based editing of *T. brucei* CPSF3 Asn<sup>232</sup> was carried out as described (8). Briefly, an sgRNA construct was assembled using the cpsfgF and cpsfgR primers. The resulting construct was linearised with NotI prior to transfection into 2T1<sup>T7-Cas9</sup> cells. The cpsfN<sup>232</sup>T oligonucleotide was used as the single-stranded repair template and acoziborole selection was applied at 2 x EC<sub>50</sub> for eight days. A negative control lacking the repair template failed to yield acoziborole-resistant cells. Resistant clones were isolated, from which a segment spanning the editing site was PCR-amplified and sequenced.

CPSF-RF: GATCGGGCCCGGTACCACAGACACGCGACTTCATCC  
CPSF-RR: GATCTCTAGAGGATCCTCTCGTGCTCTGCTGAACAT  
CPSF-TF: GATCAAGCTTACAGACACGCGACTTCATCC  
CPSF-TR: GATCTCTAGATGCGCCCTCGTCAATGGG  
CPSF-OF: GATCTTAATTAATGTTTTACACGCGGCGTA

cpsfgF: AGGGTACAAATGGTATACGCGAAC  
cpsfgR: AAACGTTGCGGTATACCATTTGTA  
cpsfN<sup>232</sup>T:  
CGATATTCTCATTGCAGAGAGTACATATGGAATTAGGGAGTTAGAGTCACGTGAAGAGCGG  
GAATCCC

**Protein blotting.** *T. brucei* parasites were grown with or without tetracycline for 24 h and harvested. Samples were then resuspended in Laemmli buffer and boiled for 5 min. Lysates (4 x 10<sup>6</sup> cells/well) were separated on 8% acylamide gels and transferred to nitrocellulose membrane. The top half of the membrane (above 70 kDa) was blocked with 5% BSA in TBS (GFP) and the bottom half (below 70 kDa) was blocked in 5% skimmed milk in PBS (EF1 $\alpha$ ; control) for 1 h. Blots were then incubated with either  $\alpha$ -GFP (1:1000; D5.1XP, Cell signalling Technology) or  $\alpha$ -EF1 $\alpha$  (1:20000; Merck Millipore) primary antibodies overnight. Membranes were then incubated with either rabbit HRP (For GFP, 1:5000; BioRad) or mouse HRP (For EF1 $\alpha$ , 1:5000; BioRad) secondary antibodies for 1 h. Blots were developed using ECL plus (with enhanced chemiluminescence; GE Healthcare).

**Microscopy.** Fluorescence microscopy was carried out according to standard protocols. Briefly, 1 x 10<sup>6</sup> cells were fixed in 2% formaldehyde in PBS, washed in PBS and allowed to dry onto coverslips. Cells were mounted in Vectashield (Vector Laboratories) containing the DNA counterstain DAPI. GFP fluorescence images were captured using a Zeiss Axiovert 200M fluorescence microscope and processed in ZenPro (Zeiss).

**Phylogeny and domain analysis.** The sequences were retrieved from TritypDB, PlasmoDB, ToxoDB and NCBI: *T. b. brucei* (Tb927.4.1340); *T. b. gambiense* DAL972 (XP\_011772702.1, Tbg972.4.1170); *T. congolense* IL3000 (CCC90000.1, TcIL3000\_4\_840.1); *Leishmania donovani* (LdBPK\_343210.1); *T. cruzi sylvio* X10/1 (TCSYLVIO\_003775); *Trichomonas vaginalis* G3 (TVAG\_437970); *Thermus thermophilus* (YP\_143518.1); *Toxoplasma gondii*

(TGME49\_285200); *Plasmodium falciparum* (PF3D7\_1438500) and *Homo sapiens* (AAF00224.1). Alignment and tree generation were performed using Clustal X and viewed using TreeView X. Domains figures were generated using InterPro and Prosite MyDomains.

***In silico* docking studies.** To identify suitable template structures, the *T. brucei* CPSF3 sequence (UniProtKB - Q581U7) was used to query the PDB using “BLAST” as implemented in the NCBI blastp suite (<https://blast.ncbi.nlm.nih.gov/>). Endonucleases from three different species; human CPSF73 (PDB code 2I7T – sequence identity 56%), *Pyrococcus horikoshii* CPSF (PDB code 3AF5 – sequence identity 29%) and *T. thermophilus* TTHA0252 (several structures available exemplified by PDB code 3IEM – sequence identity 31%) were identified as close analogues that could be used as template structures. The *T. thermophilus* structure is complexed with a stable RNA analogue bound to the catalytic site located at the interface between the metallo- $\beta$ -lactamase and  $\beta$ -CASP domains whereas both human and *P. horikoshii* structures are apo forms in which the Zn containing binding site is inaccessible. Thus, the *T. thermophilus* structure was selected as template. The alignment (Fig. S4A) indicates the typical sequence motifs associated to metallo- $\beta$ -lactamase (9) and  $\beta$ -CASP (10) catalytic activity. The presence of His<sup>446</sup> is associated with specificity for RNA substrates (11).

A homology model for the *Tb*CPSF3 structure was built using the knowledge-based method in Prime (12). The Zn atoms were modelled in the structure but not the substrate. Due to its empty p-orbital, the B atom in acoziborole is a strong electrophile (Lewis acid) that can react with solvent water molecules. The nucleophilic attack of an activated water molecule on the trigonal boron atom leads to the formation of a tetrahedral negatively charged boron species (Fig. S4B) (13). The three-dimensional structure of the hydroxylated form of acoziborole was built in Maestro (12), minimized with the OPLS3 force field and docked in the catalytic site of the *Tb*CPSF3 model using GLIDE. In the template structure, the Arg<sup>270</sup> side-chain interacts with an RNA phosphate unit such that it adopts a folded conformation. In the absence of the pre-mRNA

phosphate or a phosphate mimic, we considered additional side-chain conformations. The acoziborole binding mode was further investigated by induced-fit docking (12) that accounts for the flexibility of the binding site residues.



## SI REFERENCES

1. Alsford S, Kawahara T, Glover L, & Horn D (2005) Tagging a *T. brucei* *RRNA* locus improves stable transfection efficiency and circumvents inducible expression position effects. *Mol Biochem Parasitol* 144(2):142-148.
2. Glover L, *et al.* (2015) Genome-scale RNAi screens for high-throughput phenotyping in bloodstream-form African trypanosomes. *Nat Protoc* 10(1):106-133.
3. Alsford S & Horn D (2008) Single-locus targeting constructs for reliable regulated RNAi and transgene expression in *Trypanosoma brucei*. *Mol Biochem Parasitol* 161(1):76-79.
4. Raz B, Iten M, Grether-Buhler Y, Kaminsky R, & Brun R (1997) The Alamar Blue assay to determine drug sensitivity of African trypanosomes (*T.b. rhodesiense* and *T.b. gambiense*) *in vitro*. *Acta Trop* 68(2):139-147.
5. Langmead B & Salzberg SL (2012) Fast gapped-read alignment with Bowtie 2. *Nat Methods* 9(4):357-359.
6. Li H, *et al.* (2009) The Sequence Alignment/Map format and SAMtools. *Bioinformatics* 25(16):2078-2079.
7. Carver T, Harris SR, Berriman M, Parkhill J, & McQuillan JA (2012) Artemis: an integrated platform for visualization and analysis of high-throughput sequence-based experimental data. *Bioinformatics* 28(4):464-469.
8. Rico E, Jeacock L, Kovarova J, & Horn D (2018) Inducible high-efficiency CRISPR-Cas9-targeted gene editing and precision base editing in African trypanosomes. *Sci Rep* 8(1):7960.
9. Ishikawa H, Nakagawa N, Kuramitsu S, & Masui R (2006) Crystal structure of TTHA0252 from *Thermus thermophilus* HB8, a RNA degradation protein of the metallo- $\beta$ -lactamase superfamily. *J Biochem* 140(4):535-542.
10. Mandel CR, *et al.* (2006) Polyadenylation factor CPSF-73 is the pre-mRNA 3'-end-processing endonuclease. *Nature* 444(7121):953-956.
11. Callebaut I, Moshous D, Mornon JP, & de Villartay JP (2002) Metallo- $\beta$ -lactamase fold within nucleic acids processing enzymes: the  $\beta$ -CASP family. *Nucleic Acids Res* 30(16):3592-3601.
12. Schrödinger (2017) Small Molecule Drug Discovery suite. *Release 2017-4*.
13. Baker SJ, Tomsho JW, & Benkovic SJ (2011) Boron-containing inhibitors of synthetases. *Chem Soc Rev* 40(8):4279-4285.
14. Brinkman EK, *et al.* (2018) Kinetics and fidelity of the repair of Cas9-induced double-strand DNA breaks. *Mol Cell* 70(5):801-813 e806.

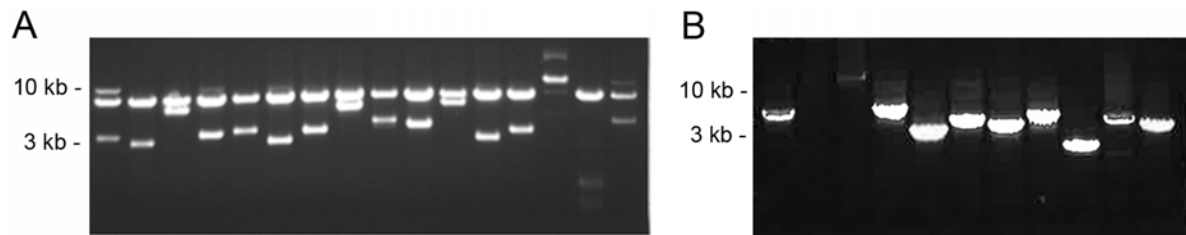

**Fig. S1.** Assessment of *T. b. brucei* genomic DNA inserts in pRPa<sup>OEX</sup> library and in the *T. b. brucei* library. (A) Representative gel showing DNA from sixteen bacterial colonies from the plasmid library digested with FseI; 30 colonies were analysed in total. Backbone, ~6.5 kbp; inserts, 3-10 kbp. (B) Representative gel showing PCR products between 3-10 kb from eleven *T. b. brucei* clones from the library; 22 clones were analysed in total.

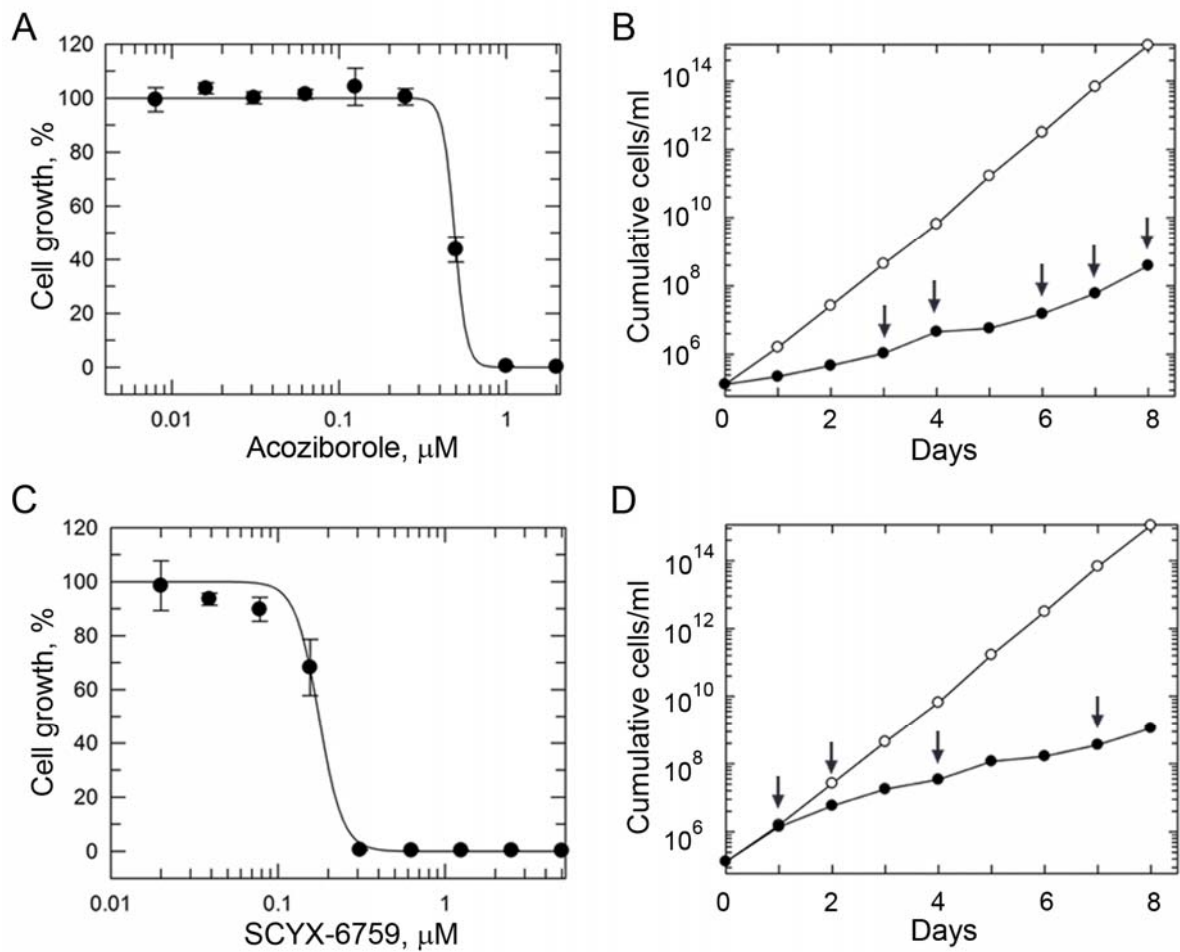

**Fig. S2.** Acoziborole and SCYX-6759  $EC_{50}$  and library screening. (A) Dose-response curve for acoziborole:  $EC_{50} = 0.49 \pm 0.02 \mu\text{M}$ . (B) The growth curves indicate expansion of the induced library in the absence (open circles) or presence (closed circles) of acoziborole. For the drug-treated culture, black arrows indicate the addition of Tet plus drug. (C) Dose-response curve for SCYX-6759:  $EC_{50} = 0.18 \pm 0.01 \mu\text{M}$ . (D) As in B but for SCYX-6759.

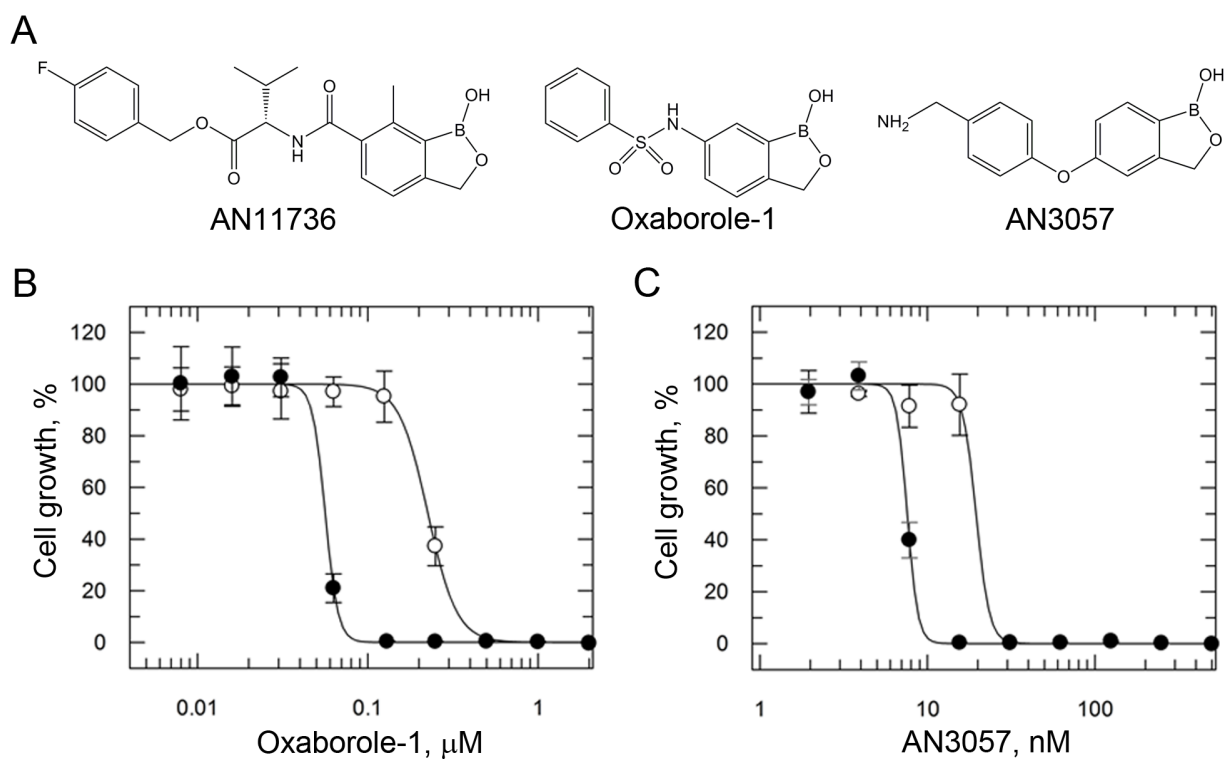

**Fig. S3.** Cells overexpressing CPSF3<sup>GFP</sup> are resistant to oxaborole-1 and AN3057. (A) Chemical structures of AN11736, oxaborole-1 and AN3057. (B) Dose-response curves for oxaborole-1 with (open circles) and without (closed circles) CPSF3<sup>GFP</sup> overexpression: EC<sub>50</sub> no Tet,  $0.06 \pm 0.001 \mu\text{M}$ ; + Tet,  $0.23 \pm 0.004 \mu\text{M}$ ; 4-fold shift. (C) As in B but for AN3057: EC<sub>50</sub> no Tet,  $7.58 \pm 0.09 \text{ nM}$ ; + Tet,  $19.53 \pm 2.28 \text{ nM}$ ; 2.6-fold shift.

A

|                        |                                                                                                                    |     |
|------------------------|--------------------------------------------------------------------------------------------------------------------|-----|
|                        | ** * . :: : ***** . . . . . : : * : : : * * * * :                                                                  |     |
| <i>T. brucei</i>       | E VGRSCVVRYKGRS VMLDCGNHP AKSGLDSL PPFDSIR CDEIDL VLI THF HLDHC G GALP                                             | 108 |
| <i>T. congolense</i>   | E VGRSCIVVRYKGRS VMLDCGNHP AKSGLDSL PPFDSIR CCEIDL VVLI THF HLDHC G GALP                                           | 108 |
| <i>T. cruzi</i>        | E VGRSCVILRYKGRS VMLDCGNHP AKSGLDSL PPFDSIR CDEIDL VLI THF HLDHC G GALP                                            | 108 |
| <i>L. donovani</i>     | E VGRSCVVRYKGRG VMLDCGNHP AKSGLDSL PPFDSIR CDEIDL VVLI THF HLDHC G GALP                                            | 108 |
| <i>H. sapiens</i>      | E VGRSCIILEFKGRK IMLDCGIHP GLEGMDAL PYIDLIDPAEIDL LLI SHF HLDHC G GALP                                             | 108 |
| <i>T. vaginalis</i>    | E VGRSC IILKYHRKR VMLDCGIH P AYENFGGLP FIDAIDPAKID VLLI THF HLDHC G GALP                                           | 108 |
| <i>T. thermophilus</i> | E VTGSAHLLLAGGRR VLLDCGMF O GKBEARNHAPFG -FDPKEVDA VLL THA HLDHV G VR LP                                           | 107 |
|                        | : : : * : * : * : . : : * : : : : : : . : . : . : : :                                                              |     |
| <i>T. brucei</i>       | YFCEQTSFRGRIFM TSATKAFYKVMNDFLRIGA ---SAEDIVNNEWLQSTIEK IETVEY                                                     | 165 |
| <i>T. congolense</i>   | YFCEQTA FKGRIFM TSATKAFYKVMNDFLRVGA ---SAEDIVNNEWLQSTIEK IETVEY                                                    | 165 |
| <i>T. cruzi</i>        | YFCEQTA FKGRVFM TSATKAFYKVMNDFLRVGA ---SANDIVTNEWLQSTIEK IETVEY                                                    | 165 |
| <i>L. donovani</i>     | YFCNQTSFKGRIFM TSATKAFYKVMNDFLRIGA ---GASDLVTSEWLQSTIEDRIETVEY                                                     | 165 |
| <i>H. sapiens</i>      | WFLQKTSFKGRTFM THATAKAIYRWLLSDYVKVSN -ISADMLY TETDLESMDKIETINF                                                     | 167 |
| <i>T. vaginalis</i>    | WFLTQTNFSGPCFMTHTTKTISKTL LDVYVGVSGRGSEEP NLFTRADV ANVQMITAVNY                                                     | 168 |
| <i>T. thermophilus</i> | KLFR EG- YRGPVYATRATVLLMEIVLEDALKVMD -----EPFFGPE DVEEALGHLRPLEY                                                   | 161 |
|                        | : . : : * : * : * : : : * : : * : : . . * . . : *                                                                  |     |
| <i>T. brucei</i>       | HEEVTVNGIHFQPFNAGH VLGAALF MVDIAGMKLLYTG FSRVPDRHLLGAEVPP-----                                                     | 220 |
| <i>T. congolense</i>   | HEEVTVNGIHFQPFNAGH VLGAALF MVDIAGMKVLYTG FSRVPDRHLLGAEVPP-----                                                     | 220 |
| <i>T. cruzi</i>        | HEEVTVNGIRFQPFNAGH VLGAALF MVDIAGMKTLYTG FSRVPDRHLLGAEVPS-----                                                     | 220 |
| <i>L. donovani</i>     | HEEVTVNGISFQPFNAGH VLGAALF MVDIAGMRALYTG FSRVPDRHLLGAEVPP-----                                                     | 220 |
| <i>H. sapiens</i>      | HEVKEVAGIKFWCYHAGH VLGAAMF MIEIAGVKLLYTG FSRQEDRHLMAAEIPN-----                                                     | 220 |
| <i>T. vaginalis</i>    | HQTVTHQGIKMTCPYAGH VLGAAMW VELDGVK VLYTG FSL ENERHLQGA EIPKSLSGE                                                   | 228 |
| <i>T. thermophilus</i> | GEWLR L GALS LAFGQAGH L P GSAFVVAQEGRTLVYSGLGNREKDVLPDPSLP-----                                                    | 216 |
|                        | . : : : * * * . . : * : . . : * : * * * : * * * * : *                                                              |     |
| <i>T. brucei</i>       | -YSPDILIAES L N G I R E L E S R E E R E S L F T T W V H D V V K G G R C L I P V P A I G R A Q E L L L I L E        | 279 |
| <i>T. congolense</i>   | -YSPDILIAES L N G I R E L E S R E E R E T L F T T W V H D V V K G G R C L I P V P A I G R A Q E L L L I L E        | 279 |
| <i>T. cruzi</i>        | -YSPDILIAES L N G I R E L E S R E E R E T L F T T W V H D V V K G G R C L I P V P A I G R A Q E L L L I L E        | 279 |
| <i>L. donovani</i>     | -YSPDILIAES L N G I R E L E S R E E R E H L F T S S V H D V V R R G R C L I P V P A I G R A Q E L L L I L E        | 279 |
| <i>H. sapiens</i>      | -IKPDILIIEST YGT R I H E K R E R E A R F C N T V H D I V N R G G R G L I P V P A I G R A Q E L L L I L D           | 279 |
| <i>T. vaginalis</i>    | IIRPDV L I M E S I H G L R T E S R V D R E Y R F I D N V T K I I K R G R C L I P I P A I G R A Q E L L I I L D     | 288 |
| <i>T. thermophilus</i> | --LADLV LAE G Y G D N P R P Y R E T V R E F L E I L E K T L S Q G G K V L I P T P A I G R A Q E I L Y V L Y        | 274 |
|                        | . . . . * * * : * : : * : . . : : . . * : :                                                                        |     |
| <i>T. brucei</i>       | EYWEAHKELQHIPIYYASSLAQRCKM KLYQTFVSAMNDRVKQH ENHRNPFVFKYIQSLLD                                                     | 339 |
| <i>T. congolense</i>   | EYWEAHKELQHIPIYYASSLAQRCKM KLYQTFVSAMNDRVKEQH ENHRNPFVFKYIQSLLD                                                    | 339 |
| <i>T. cruzi</i>        | EYWEAHKELQHIPIYYASSLAQRCKM KLYQTFVSAMNDRVKQH ANHRNPFVFKYIHSLME                                                     | 339 |
| <i>L. donovani</i>     | EFWDAHKELQNIPIYYASSLAQRCKM KLYQTFVSAMNDRVKQH ANHRNPFVFKYIHSLMD                                                     | 339 |
| <i>H. sapiens</i>      | EYWQNHPELHDIPIYYASSLAQRCKM AVYQTYVNAMNDKIRKQ - ININPFVFKHISNLKS                                                    | 338 |
| <i>T. vaginalis</i>    | EYWESHPEYNGVPIYYGNSLAKQAIAAYNAFYQDHNSRV ---VTAKGKFESYV KYIRD                                                       | 344 |
| <i>T. thermophilus</i> | TEGHR ---LPRAPIYLDSPMAGRVL SLYPRLVRYFSEEVQAHLFQGNKFRPAGLEVVEH                                                      | 331 |
|                        | . * * : . . . . : * . . : : * . . . . * : * : : :                                                                  |     |
| <i>T. brucei</i>       | TRSFEDTG ---PCVVLASPGMLQSGISLEL FERWCGDKRNGIIVAGYCV DGTI AKDILS                                                    | 395 |
| <i>T. congolense</i>   | TRSFEDTG ---PCVVLASPGMLQSGISLEL FERWCGDKRNGIIVAGYCV DGTI AK E I L S                                                | 395 |
| <i>T. cruzi</i>        | TRSFEDTG ---PCVVLASPGMLQSGISLEL FERWCGDRRNGI I IAGYCV DGTI AK D I L T                                              | 395 |
| <i>L. donovani</i>     | TKSFEDNG ---PCVVLASPGMLQSGISLEL FERWCGDRRNGI I M A G Y C V D G T I A K D V L A                                     | 395 |
| <i>H. sapiens</i>      | MDHFDDIG ---PSVVMASPGMLQSGLSRELFESWCTDKRNGV I IAGYCV EGT LAKHIMS                                                   | 394 |
| <i>T. vaginalis</i>    | YD -FDDSL ---PCVVL CSPAM L QNGMSRK IFEAWCSNSVNGLIIPG I V D G T L P Q V L M K                                       | 399 |
| <i>T. thermophilus</i> | TEASKALNRA PGMVVLASGMLLAGGR I L H H L K H G L S D P R N A L V F V G Y Q Q G L G A E I I A                          | 391 |
|                        | . * : * : * : : * * * . . : : : * : : * * * : * :                                                                  |     |
| <i>T. brucei</i>       | KPREITKPDGKVLPLRMRTIQSVS FSAHSDGRQTRDFIQALPKTKHVILVHGNIGAMGQL                                                      | 455 |
| <i>T. congolense</i>   | KPKEITKPDGKVLPLRMRTIQSVS FSAHSDGRQTRDFIQALPNTKHVILVHGNIGAMGQL                                                      | 455 |
| <i>T. cruzi</i>        | KPKEVTKPDGKVLPLRMRTIQSVS FSAHSDGRQTRDFIQALPKTQH VILVHGNIGAMGQL                                                     | 455 |
| <i>L. donovani</i>     | KPKEVAKPDGKVLPLRMRTIEAVS FSAHSDGRQTRDFIQSLTKVKHTILVHGNIPGAMGQL                                                     | 455 |
| <i>H. sapiens</i>      | EP E I T T M S G Q K L P L K M S - V D Y I S F S A H T D Y Q Q T S E F I R A L - K P P H V I L V H G N Q E M A R L | 452 |
| <i>T. vaginalis</i>    | NPAEITTL SGK I I P R K I S - I D Y V S F S G H A D F N Q T S R F I T E L - K P K R I V L I H G V C G L M M Q L     | 457 |
| <i>T. thermophilus</i> | RPPAVR - I L G E E V P L R A S V H T L G G F S G H A G Q D E L L D W L Q G E --- P R V V L V H G E E E K L L A L   | 447 |

B

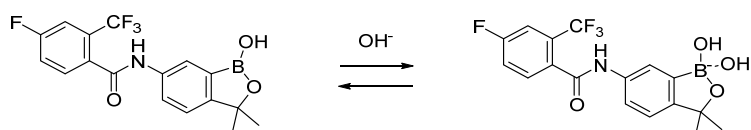

i. Trigonal planar neutral B atom

ii. Tetrahedral negatively charged B

**Fig. S4.** CPSF3 alignment and benzoxaborole species to support docking studies. (A) Alignment of CPSF3 orthologues. Domains: grey, metallo- $\beta$ -lactamase; green,  $\beta$ -CASP; blue, Zn-dependent metallo-hydrolase see Fig. 4A; Arg<sup>270</sup> and Tyr<sup>383</sup> are highlighted in red, see Fig. 4B; other residues defining the binding site are in pink and yellow (Asn<sup>232</sup> and equivalent residue in other species), see Fig. 4B-E and text for more details. (B) The equilibrium between the neutral non-hydroxylated form of acoziborole (i) and the tetrahedral negatively charged hydroxylated form (ii).

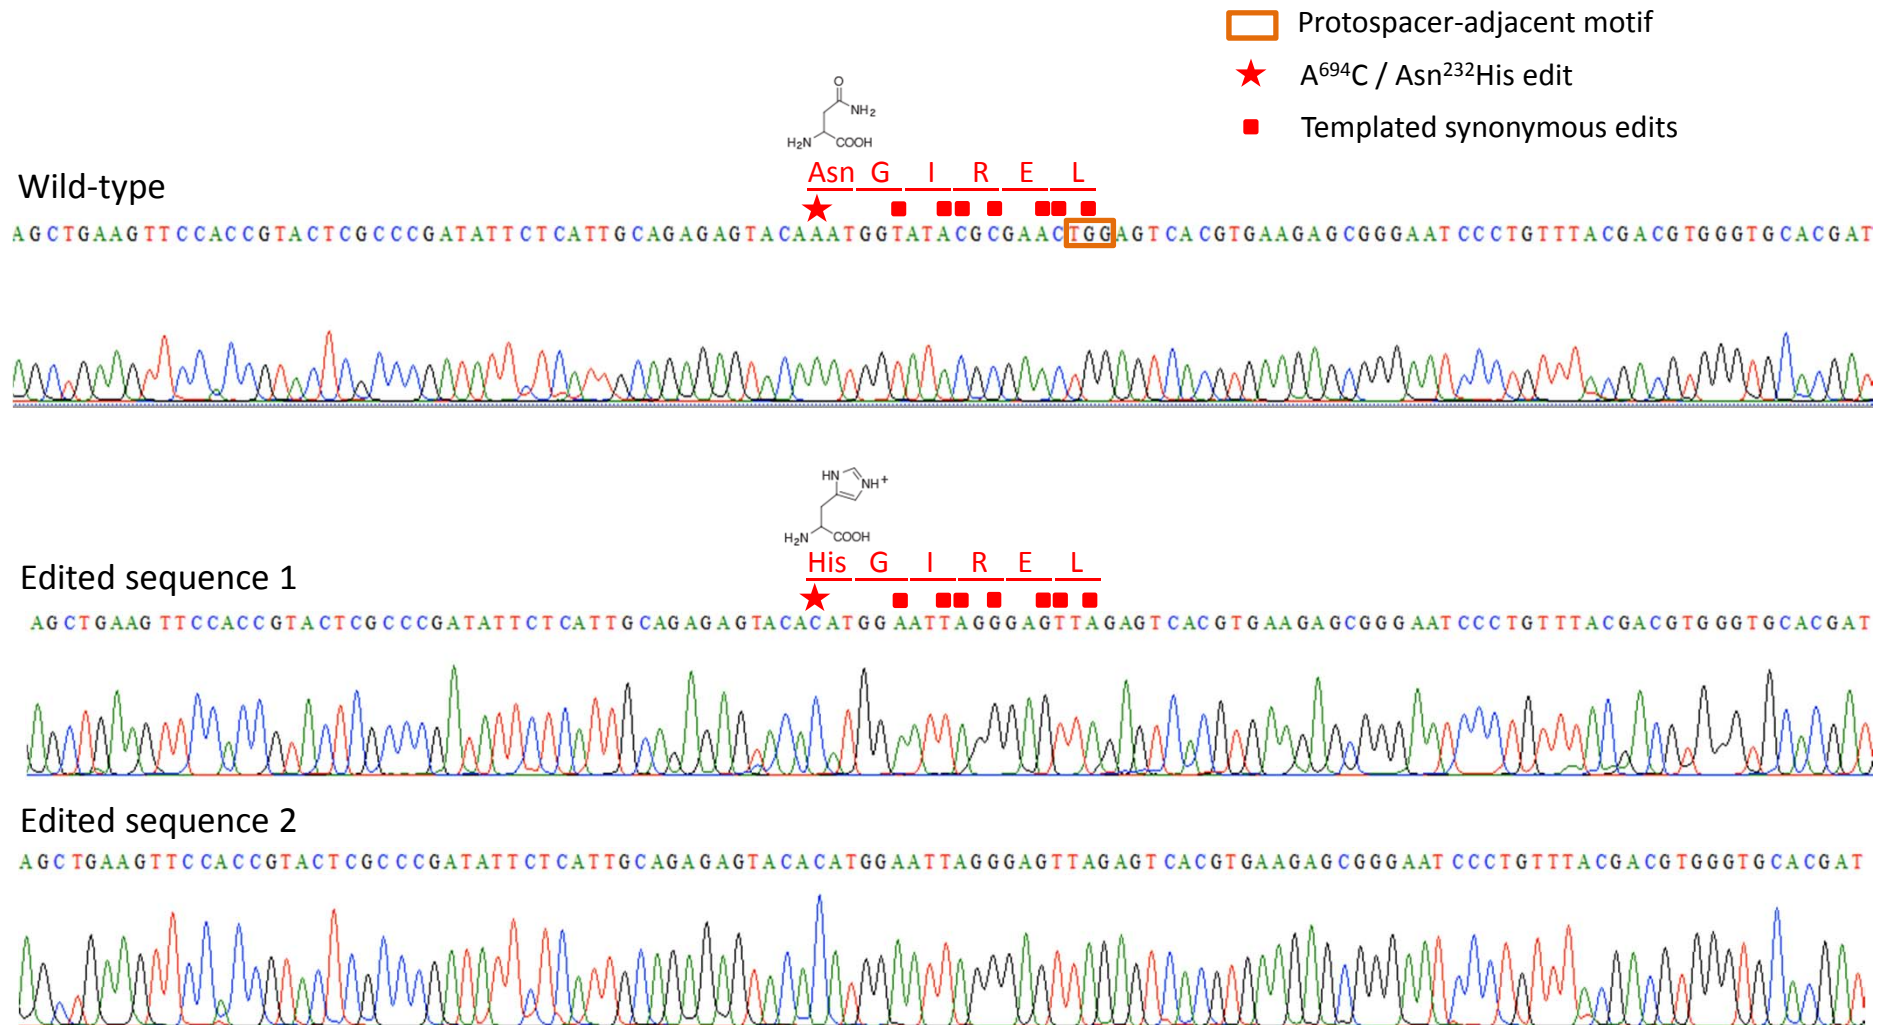

**Fig. S5.** Cas9-based editing of *T. brucei* CPSF3. The repair template included seven synonymous changes, including one that disrupted the protospacer-adjacent motif, and a non-synonymous change designed to replace Asn<sup>232</sup> with Tyr. Both acoziborole-resistant cultures analysed (three clones from each) incorporated all of the synonymous changes and an Asn<sup>232</sup>His edit, suggesting that the Tyr edit was not tolerated. The non-templated A<sup>694</sup>C edit may be readily obtained due to error-prone repair (14). The Asn and His side-chains are also shown.

**Supplemental Table S1:** Fragment hits from the DDD85646 screen (containing genes at >1000 RPKM)

| Fragment | Gene ID        | Gene name                                     | RPKM   | Reads  | Fragment size (kbp)                         | Total reads |
|----------|----------------|-----------------------------------------------|--------|--------|---------------------------------------------|-------------|
| 1        | Tb927.10.14230 | hypothetical protein, conserved               | 23244  | 391682 | 4                                           | 2712855     |
|          | Tb927.10.14240 | N-methyltransferase (NMT)                     | 150001 | 823520 |                                             |             |
|          | Tb927.10.14250 | hypothetical protein, conserved               | 56036  | 199589 |                                             |             |
| 2        | Tb927.9.4000   | hypothetical protein, conserved               | 8020   | 35660  | 3.1                                         | 88131       |
|          | Tb927.9.4040   | nicotinamidase, putative                      | 2648   | 6667   |                                             |             |
| 3        | Tb927.9.13620  | hypothetical protein, conserved               | 29     | 707    | 6.1<br>[may comprise overlapping fragments] | 54217       |
|          | Tb927.9.13630  | hypothetical protein, conserved               | 1295   | 5932   |                                             |             |
|          | Tb927.9.13650  | ADP-ribosylation factor, putative (ARF1)      | 1919   | 4314   |                                             |             |
|          | Tb927.9.13680  | ADP-ribosylation factor, putative (ARF1)      | 4332   | 9736   |                                             |             |
|          | Tb927.9.13710  | ADP-ribosylation factor, putative (ARF1)      | 4320   | 9709   |                                             |             |
|          | Tb927.9.13740  | ADP-ribosylation factor, putative (ARF1)      | 2510   | 5641   |                                             |             |
| 4        | Tb927.7.6340   | hypothetical protein, conserved               | 2742   | 14920  | 3.7                                         | 39770       |
|          | Tb927.7.6350   | NADH-ubiquinone oxidoreductase, mitochondrial | 1948   | 6555   |                                             |             |
| 5        | Tb927.11.3040  | hypothetical protein                          | 3011   | 2848   | 3.3                                         | 32045       |
|          | Tb927.11.3050  | hypothetical protein                          | 2417   | 10597  |                                             |             |
|          | Tb927.11.3060  | Phosphate transport (Pho88), putative         | 2696   | 5994   |                                             |             |

Total reads mapped = 4,094,002 (97% of all reads).

**Supplemental Table S2:** Fragment hits from the Acoziborole screen (containing genes at >1000 RPKM)

| Fragment | Gene ID       | Gene name                                                 | RPKM   | Reads   | Fragment size (kbp) | Total reads |
|----------|---------------|-----------------------------------------------------------|--------|---------|---------------------|-------------|
| 1        | Tb927.4.1350  | glyoxalase II                                             | 125221 | 1509896 | 4.3                 | 6100600     |
|          | Tb927.4.1340  | cleavage and polyadenylation specificity factor subunit 3 | 170185 | 3309917 |                     |             |
|          | Tb927.4.1330  | DNA topoisomerase IB, large subunit                       | 18019  | 316811  |                     |             |
| 2        | Tb927.10.5620 | fructose-bisphosphate aldolase, glycosomal                | 721    | 6780    | 3.7                 | 57735       |
|          | Tb927.10.5630 | hypothetical protein, conserved                           | 1868   | 8766    |                     |             |
|          | Tb927.10.5640 | Gem-associated protein 2, putative                        | 2296   | 28725   |                     |             |

Total reads mapped = 8,397,885 (97% of all reads).

**Supplemental Table S3:** Fragment hits from the SCYX-6759 screen (containing genes at >1000 RPKM)

| Fragment | Gene ID      | Gene name                                                 | RPKM  | Reads  | Fragment size (kbp) | Total reads |
|----------|--------------|-----------------------------------------------------------|-------|--------|---------------------|-------------|
| 1        | Tb927.4.1330 | DNA topoisomerase IB, large subunit                       | 5612  | 64134  | 4.3                 | 1104848     |
|          | Tb927.4.1340 | cleavage and polyadenylation specificity factor subunit 3 | 46291 | 585176 |                     |             |
|          | Tb927.4.1350 | glyoxalase II                                             | 36415 | 285391 |                     |             |

Total reads mapped = 5,449,729; (93% of all reads).

Barcoded, non-redundant fragments containing at least one full-length CDS are shown. Fragments are ranked according to total read-count.

Overexpressed gene  
Adjacent/not full CDS
